# Supplementary material for: Distinct Features of Germinal Center Reactions in Macaques Infected by SIV or Vaccinated with a T-Dependent Model Antigen
Source: MDPI journal article supplement (doi:10.3390/v13020263), 2021-02-09
Supplement: s1 [file s1]

**Table S1. MHC haplotypes of macaques**

| <b>SIV<sup>+</sup> (n=10)</b> | <b>TT (n=6)</b> |
|-------------------------------|-----------------|
| H2/H1                         | H2/H5           |
| H2/RecH1H4                    | H1/RecH2H3H1    |
| H2/H4                         | H2/H4           |
| RecH3H2/RecH2H1               | H1/H1           |
| H3/RecH1H5                    | H1/RecH3H5      |
| H3/H5                         | H3/RecH3H4      |
| H3/H2                         |                 |
| H3/H1 (2 macaques)            |                 |
| H3/RecH3H1                    |                 |
