# Supplementary material for: Distinct Features of Germinal Center Reactions in Macaques Infected by SIV or Vaccinated with a T-Dependent Model Antigen
Source: MDPI journal article supplement (doi:10.3390/v13020263), 2021-02-09
Supplement: s1 [file s1]

**Table S3. Detection of BAFF receptors on B- and T-cells by flow cytometry**

| Panel 6                      |                  |            |                       | Panel 7                    |                  |            |                       |
|------------------------------|------------------|------------|-----------------------|----------------------------|------------------|------------|-----------------------|
| BAFF-R expression on B-cells |                  |            |                       | TACI expression on B-cells |                  |            |                       |
| Fluorescent dye              | Antigen          | clone      | Manufact <sup>a</sup> | Fluorescent dye            | Antigen          | clone      | Manufact              |
| Blue stain (UV)              | <b>Live-Dead</b> | /          |                       | Blue stain (UV)            | <b>Live-Dead</b> | /          | Invitrogen            |
| PerCP                        | <b>CD45</b>      | D058-1283  | BD                    | PerCP                      | <b>CD45</b>      | D058-1283  | BD                    |
| V500                         | <b>CD3</b>       | SP34.2     | BD                    | V500                       | <b>CD3</b>       | SP34.2     | BD                    |
| Pe-Cy7                       | <b>CD19</b>      | J3.119     | Coulter               | Pe-Cy7                     | <b>CD19</b>      | J3.119     | Coulter               |
| AlexaFluor700                | <b>CD20</b>      | 2H7        | BLE                   | AlexaFluor700              | <b>CD20</b>      | 2H7        | BLE                   |
| FITC                         | <b>IgD</b>       | Rabbit IgG | AbD                   | FITC                       | <b>IgD</b>       | Rabbit IgG | AbD                   |
| BV711                        | <b>CD21</b>      | B-ly4      | BD                    | BV711                      | <b>CD21</b>      | B-ly4      | BD                    |
| BV421                        | <b>CD27</b>      | M-T271     | BD                    | BV421                      | <b>CD27</b>      | M-T271     | BD                    |
| PE                           | <b>BAFF-R</b>    | 11C1       | BLE                   | PE                         | <b>TACI</b>      | 1A1        | BLE                   |
| PE                           | <b>mIgG1</b>     | MOPC21     | BLE                   | PE                         | <b>Rat IgG2a</b> | RTK2758    | BLE                   |
| AlexaFluor647                | <b>Bcl-6</b>     | K112-91    | BD                    | AlexaFluor647              | <b>Bcl-6</b>     | K112-91    | BD                    |
| AlexaFluor647                | <b>mIgG1</b>     | MOPC21     | BD                    | AlexaFluor647              | <b>mIgG1</b>     | MOPC21     | BD                    |
| Panel 8                      |                  |            |                       | Panel 9                    |                  |            |                       |
| BAFF-R expression on T-cells |                  |            |                       | TACI expression on T-cells |                  |            |                       |
| Fluorescent dye              | Antigen          | clone      | Manufact <sup>a</sup> | Fluorescent dye            | Antigen          | clone      | Manufact <sup>a</sup> |
| Blue stain (UV)              | <b>Live-Dead</b> | /          |                       | Blue stain (UV)            | <b>Live-Dead</b> | /          | Invitrogen            |
| PerCP                        | <b>CD45</b>      | D058-1283  | BD                    | PerCP                      | <b>CD45</b>      | D058-1283  | BD                    |
| V500                         | <b>CD3</b>       | SP34.2     | BD                    | V500                       | <b>CD3</b>       | SP34.2     | BD                    |
| Pe-Cy7                       | <b>CD4</b>       | L200       | BD                    | Pe-Cy7                     | <b>CD4</b>       | L200       | BD                    |
| APC-H7                       | <b>CD45RA</b>    | 5H9        | BD                    | APC-H7                     | <b>CD45RA</b>    | 5H9        | BD                    |
| APC                          | <b>CXCR5</b>     | MU5UBEE    | eBios                 | APC                        | <b>CXCR5</b>     | MU5UBEE    | eBios                 |
| BV711                        | <b>PD-1</b>      | EH12.2H7   | BLE                   | BV711                      | <b>PD-1</b>      | EH12.2H7   | BLE                   |
| PE                           | <b>BAFF-R</b>    | 11C1       | BLE                   | PE                         | <b>TACI</b>      | 1A1        | BLE                   |
| PE                           | <b>mIgG1</b>     | MOPC21     | BLE                   | PE                         | <b>Rat IgG2a</b> | RTK2758    | BLE                   |

(a) Manufacturer/distributor - **AbD**: AbD Serotec - Bio-Rad, Colmar, France; **BD**: BD Biosciences, Rungis, France; **BLE**: Biolegend, St Quentin-en-Yvelines, France; **Coulter**: Beckman Coulter, Villepinte, France; **eBios**: eBiosciences™, Paris ; **Invitrogen**: Life Technologies SAS, Saint Aubin, France.
