# Supplementary material for: Distinct Features of Germinal Center Reactions in Macaques Infected by SIV or Vaccinated with a T-Dependent Model Antigen
Source: MDPI journal article supplement (doi:10.3390/v13020263), 2021-02-09
Supplement: s1 [file s1]

**Table S4. Antibodies for Immunohistochemistry**

| Antibodies       | Clone | Species (Isotype)               | Manufacturer <sup>a</sup> |
|------------------|-------|---------------------------------|---------------------------|
| CD20             | L26   | Mouse (IgG2a)                   | DAKO                      |
| CD3              |       | Rabbit (IgG)                    | DAKO                      |
| CD4              | 1F6   | Mouse (IgG1)                    | Novocastra                |
| CD8              |       | Rabbit (IgG)                    | Abcam                     |
| FoxP3            | 259D  | Mouse (IgG1)                    | BLE                       |
| Active Caspase-3 |       | Rabbit (IgG)                    | CST                       |
| Granzyme B       | GrB7  | Mouse (IgG2a)                   | DAKO                      |
| Ki67             | B56   | Mouse (IgG1)                    | BD                        |
| IRF4             | MUM1  | Mouse (IgG1)                    | DAKO                      |
| CD68             | KP1   | Mouse (IgG1)                    | DAKO                      |
| IgM              |       | Rabbit (F(ab) <sub>2</sub> IgG) | DAKO                      |
| IgG              |       | Rabbit (F(ab) <sub>2</sub> IgG) | DAKO                      |
| PD1              |       | Goat (IgG)                      | Bio-techne                |

(a) **Abcam**: Paris, France; **BLE**: Biolegend, St Quentin-en-Yvelines, France; **BD**: BD Biosciences, Rungis, France ; **Bio-techne**, Lille, France ; **CST**: Cell Signaling Technology, Ozyme, St Quentin-en-Yvelines, France; **DAKO**: Les Ulis, France; **Novocastra**: Leica Biosystems, Nanterre, France.
