# Supplementary material for: Distinct Features of Germinal Center Reactions in Macaques Infected by SIV or Vaccinated with a T-Dependent Model Antigen
Source: MDPI journal article supplement (doi:10.3390/v13020263), 2021-02-09
Supplement: s1 [file s1]

**Table S2. Antibody panels for multiparameter flow cytometry**

| Panel 1<br>Monocyte & DC subtypes    |                  |           |                       | Panel 2<br>B-cell subsets in lymphoid organs |                               |            |                       |                                      |                  |           |                       |
|--------------------------------------|------------------|-----------|-----------------------|----------------------------------------------|-------------------------------|------------|-----------------------|--------------------------------------|------------------|-----------|-----------------------|
| Fluorescent dye                      | Antigen          | clone     | Manufact <sup>a</sup> | Fluorescent dye                              | Antigen                       | clone      | Manufact <sup>a</sup> |                                      |                  |           |                       |
| Blue stain (UV)                      | <b>Live-Dead</b> | /         | Invitrogen            | Blue stain (UV)                              | <b>Live-Dead</b>              | /          | Invitrogen            |                                      |                  |           |                       |
| PerCP                                | <b>CD45</b>      | D058-1283 | BD                    | PerCP                                        | <b>CD45</b>                   | D058-1283  | BD                    |                                      |                  |           |                       |
| V500                                 | <b>CD3</b>       | SP34.2    | BD                    | V500                                         | <b>CD3</b>                    | SP34.2     | BD                    |                                      |                  |           |                       |
| AlexaFluor700                        | <b>CD20</b>      | 2H7       | BLE                   | AlexaFluor700                                | <b>CD20</b>                   | 2H7        | BLE                   |                                      |                  |           |                       |
| Pe-Cy7                               | <b>CD14</b>      | M5E2      | BD                    | Pe-Cy7                                       | <b>CD19</b>                   | J3.119     | Coulter               |                                      |                  |           |                       |
| APC-H7                               | <b>CD16</b>      | 3G8       | BD                    | FITC                                         | <b>IgD</b>                    | Rabbit IgG | AbD                   |                                      |                  |           |                       |
| ECD                                  | <b>HLA-DR</b>    | Immu357   | Coulter               | BV711                                        | <b>CD21</b>                   | B-ly4      | BD                    |                                      |                  |           |                       |
| FITC                                 | <b>BDCA-2</b>    | AC144     | MACS                  | PE                                           | <b>CD27</b>                   | M-T271     | BD                    |                                      |                  |           |                       |
| PE                                   | <b>CD123</b>     | 7G3       | BD                    | AlexaFluor647                                | <b>Bcl-6</b>                  | K112-91    | BD                    |                                      |                  |           |                       |
| APC                                  | <b>CD1c</b>      | AD5-8E7   | MACS                  | AlexaFluor647                                | <b>mlgG1</b>                  | MOPC21     | BD                    |                                      |                  |           |                       |
| APC                                  | <b>mlgG2a</b>    | S43.10    | MACS                  | BV421                                        | <b>Ki67</b>                   | B56        | BD                    |                                      |                  |           |                       |
|                                      |                  |           |                       | BV421                                        | <b>mlgG1</b>                  | X40        | BD                    |                                      |                  |           |                       |
| Panel 3<br>Follicular Helper T-cells |                  |           |                       | Panel 4<br>IFN $\gamma$ -producing T-cells   |                               |            |                       | Panel 5<br>Follicular Helper T-cells |                  |           |                       |
| Fluorescent dye                      | Antigen          | clone     | Manufact <sup>a</sup> | Fluorescent dye                              | Antigen                       | clone      | Manufact <sup>a</sup> | Fluorescent dye                      | Antigen          | clone     | Manufact <sup>a</sup> |
| Blue stain (UV)                      | <b>Live-Dead</b> | /         | Invitrogen            | Blue stain (UV)                              | <b>Live-Dead</b>              | /          | Invitrogen            | Blue stain (UV)                      | <b>Live-Dead</b> | /         | Invitrogen            |
| PerCP                                | <b>CD45</b>      | D058-1283 | BD                    | PerCP                                        | <b>CD45</b>                   | D058-1283  | BD                    | PerCP                                | <b>CD45</b>      | D058-1283 | BD                    |
| V500                                 | <b>CD3</b>       | SP34.2    | BD                    | V500                                         | <b>CD3</b>                    | SP34.2     | BD                    | V500                                 | <b>CD3</b>       | SP34.2    | BD                    |
| Pe-Cy7                               | <b>CD4</b>       | L200      | BD                    | Pe-Cy7                                       | <b>CD4</b>                    | L200       | BD                    | Pe-Cy7                               | <b>CD4</b>       | L200      | BD                    |
| APC-H7                               | <b>CD45RA</b>    | 5H9       | BD                    | Vioblue                                      | <b>CD8</b>                    | BW135/80   | MACS                  | APC-H7                               | <b>CD45RA</b>    | 5H9       | BD                    |
| PE                                   | <b>ICOS</b>      | C398.4A   | BLE                   | APC-H7                                       | <b>CD45RA</b>                 | 5H9        | BD                    | PE                                   | <b>ICOS</b>      | C398.4A   | BLE                   |
| BV711                                | <b>PD-1</b>      | EH12.2H7  | BLE                   | PE                                           | <b>ICOS</b>                   | C398.4A    | BLE                   | BV711                                | <b>PD-1</b>      | EH12.2H7  | BLE                   |
| AlexaFluor647                        | <b>Bcl-6</b>     | K112-91   | BD                    | BV711                                        | <b>PD-1</b>                   | EH12.2H7   | BLE                   | APC                                  | <b>CXCR5</b>     | MU5UBEE   | eBios                 |
| AlexaFluor647                        | <b>mlgG1</b>     | MOPC21    | BD                    | AlexaFluor700                                | <b>IFN<math>\gamma</math></b> | 4SB3       | BLE                   | BV605                                | <b>CXCR3</b>     | G025H7    | BLE                   |
| BV421                                | <b>Ki67</b>      | B56       | BD                    | AlexaFluor700                                | <b>mlgG1</b>                  | MOPC21     | BLE                   | BV605                                | <b>mlgG1</b>     | MOPC21    | BLE                   |
| BV421                                | <b>mlgG1</b>     | X40       | BD                    |                                              |                               |            |                       |                                      |                  |           |                       |

(a) Manufacturer/distributor - **AbD**: AbD Serotec - Bio-Rad, Colmar, France; **BD**: BD Biosciences, Rungis, France; **BLE**: Biolegend, Ozyme, St Quentin-en-Yvelines, France; **Coulter**: Beckman Coulter, Villepinte, France; **eBios**: eBiosciences™, Paris; **Invitrogen**: Life Technologies SAS, Saint Aubin, France; **MACS**: Miltenyi Biotec –Paris, France.
