# Supplementary material for: Distinct Features of Germinal Center Reactions in Macaques Infected by SIV or Vaccinated with a T-Dependent Model Antigen
Source: MDPI journal article supplement (doi:10.3390/v13020263), 2021-02-09
Supplement: s1 [file s1]

## Legends to supplemental Figures

### Figure S1. Levels of serum CXCL13 during TT-immunization.

ELISA was used to quantify levels of serum CXCL13 in TT-vaccinated macaques. Samples were collected before and after the prime injection (*black triangle, dotted line*) and before and after the booster dose (*black circle, plain line*). Mean value  $\pm$ SEM of the group at each time point is given. Statistical comparison between values before and after (prime or boost) vaccination was carried using a Friedman test with Dunn's multiple comparisons test but values did not reach statistical significance.

### Figure S2. Gating strategy for the identification of B-cell subsets in lymphoid organs.

Panel 2 (**Table S1**) was used to analyse the composition of the B-cell pool present in spleen and lymph node. Given are representative dot plots showing the gating strategy used to identify various B-cell subsets in live CD45<sup>+</sup> B-cells: within CD20<sup>+</sup>Bcl-6<sup>+</sup> B-cells depicted are GC B-cells; within CD20<sup>+</sup>Bcl-6<sup>-</sup> B-cells depicted are naïve B cells (SIgD<sup>+</sup>CD21<sup>+</sup>), marginal zone (MZ) B-cells (SIgD<sup>+</sup>CD21<sup>hi</sup>), resting memory B-cells (RM, SIgD<sup>-</sup>CD21<sup>+</sup>), activated memory (AM, SIgD<sup>-</sup>CD21<sup>-</sup>CD27<sup>+</sup>) and tissue-like memory (TLM, SIgD<sup>-</sup>CD21<sup>-</sup>CD27<sup>-</sup>) B-cells.

### Figure S3. Gating strategies for the identification of memory CD4 T-cell subsets.

Given are representative dot plots showing the gating strategy used to identify memory CD4 T-cell subsets in live CD45<sup>+</sup> T-cells. The gating strategy is shown for one SIV-infected macaque. Spleen cells were either stained with (A) Panel 3 (PD1, ICOS) or (B) Panel 5 (PD1, CXCR5) of **Table S1**. Accordingly, T<sub>FH</sub> subset corresponds to either PD1<sup>hi</sup>ICOS<sup>hi</sup> or PD1<sup>hi</sup>CXCR5<sup>hi</sup>; PD1<sup>int</sup> subset corresponds to either PD1<sup>int</sup>ICOS<sup>int</sup> or PD1<sup>int</sup>CXCR5<sup>int</sup> and PD1<sup>lo</sup> subset corresponds to either PD1<sup>lo</sup>ICOS<sup>lo</sup> or PD1<sup>lo</sup>CXCR5<sup>lo</sup>.
